# Supplementary material for: Construction and Validation of a nanogram to predict the impact of multiple primary tumors on survival of different subtypes of thyroid carcinoma
Source: Research Square preprint supplement (doi:10.21203/rs.3.rs-4061062/v1), 2024-04-01
Supplement: Supplementary file 1 [file 11e2026f3cc851d6a6eae6e5.xlsx]

## Sheet: Sheet1
Table2:The epidemiological information of various pathological types of thyroid cancer in this study and their corresponding HR/OR/P values.
histology	variable	HR	OR(95%CI)		P valve
ATC	age(years)
	0-39	reference	reference		reference
	40-49	0.7029	0.29-1.69		0.43
	50-59	1.0091	0.46-2.22		0.98
	60-69	1.2142	0.57-2.61		0.62
	70-79	1.6188	0.75-3.51		0.22
	80-84	1.4889	0.67-3.31		0.33
	85+	2.3429	1.05-5.22		<0.05
	race
	Black	reference	reference		reference
	white	0.6766	0.49-0.94		<0.05
	Asian	0.7277	0.49-1.09		0.12
	American Indian	3.1093	0.94-10.32		0.06
	T
	0	reference	reference		reference
	1
	2
	3
	4
	N
	0	reference	reference		reference
	1	1.1754	0.97-1.43		0.11
	M
	0	reference	reference		reference
	1	1.8455	1.52-2.24		<0.05
	MPMNs information
	only 1	reference	reference		reference
	1st	0.7078	0.40-1.27		0.24
	2nd	1.0315	0.81-1.31		0.8
	3rd or more	0.9315	0.58-1.50		0.77
	sex
	female	reference	reference		reference
	male	1.4648	0.77-2.77		0.24
FTC	age(years)
	0-39	reference	reference		reference
	40-49	2.2352	1.10-4.55		<0.05
	50-59	2.9022	1.50-5.62		<0.05
	60-69	7.3342	3.97-13.56		<0.05
	70-79	7.7213	4.12-14.48		<0.05
	80-84	15.9802	8.03-31.79		<0.05
	85+	31.1599	15.42-62.99		<0.05
	race
	Black	reference	reference		reference
	white	0.7656	0.54-1.09		0.14
	Asian	0.9704	0.60-1.51		0.9
	American Indian	1.3913	0.33-5.83		0.65
	T
	0	reference	reference		reference
	1	3.6617	0.50-26.99		0.2
	2	2.7994	0.38-20.52		0.31
	3	4.7366	0.65-34.37		0.12
	4	9.145	1.25-67.12		<0.05
	N
	0	reference	reference		reference
	1	1.8341	1.21-2.78		<0.05
	M
	0	reference	reference		reference
	1	3.8055	2.74-5.28		<0.05
	MPMNs information
	only 1	reference	reference		reference
	1st	1.6508	1.14-2.38		<0.05
	2nd	2.0093	1.51-2.68		<0.05
	3rd or more	4.0666	2.48-6.67		<0.05
	sex
	female	reference	reference		reference
	male	1.2364	0.97-1.58		0.09
MTC	age(years)
	0-39	reference	reference		reference
	40-49	1423000000000000	0-Inf		1
	50-59	1.822e+18	3.099e+17-1.072e+19		<0.05
	60-69	1.545e+17	1.395e+16-1.710e+18		<0.05
	70-79	1.499	2.771e-01-8.108e+00		0.64
	80-84	6273000	0-Inf		1
	85+	0.167	1.266e-02-2.202e+00		0.17
	race
	Black	reference	reference		reference
	white	2.198e-20	0-Inf		1
	Asian	9.76e-29	0-Inf		1
	T
	1	reference	reference		reference
	2	1.238e-07	0-Inf		1
	3	281800000	2.459e+07-3.229e+09		1
	4	10770000000	1.701e+09-6.817e+10		<0.05
	N
	0	reference	reference		reference
	1	0.02721	3.508e-03-2.111e-01		<0.05
	M
	0	reference	reference		reference
	1	2.393e+19	5.010e+18-1.143e+20		<0.05
	MPMNs information
	only 1	reference	reference		reference
	1st	58580000000	4.587e+09 7.480e+11		<0.05
	2nd	9802000000	9.370e+08 1.025e+11		<0.05
	3rd or more	6.097e+29	0-Inf		1
	sex
	female	reference	reference		reference
	male	0.1294	1.129e-02 1.482e+00		0.1
PTC	age(years)
	0-39	reference	reference		reference
	40-49	2.7701	2.19-3.50		<0.05
	50-59	4.4759	3.60-5.57		<0.05
	60-69	8.4166	6.80-10.42		<0.05
	70-79	14.8929	12.00-18.50		<0.05
	80-84	31.9036	25.21-40.38		<0.05
	85+	52.125	40.80-66.61		<0.05
	race
	Black	reference	reference		reference
	white	0.6861	0.59-0.80		<0.05
	Asian	0.6716	0.55-0.81		<0.05
	American Indian	1.0125	0.65-1.58		0.96
	T
	0	reference	reference		reference
	1	0.5643	0.35-0.92		<0.05
	2	0.6718	0.41-1.10		0.12
	3	0.7339	0.45-1.19		0.21
	4	1.8474	1.13-3.00		<0.05
	N
	0	reference	reference		reference
	1	1.2831	1.17-1.41		<0.05
	M
	0	reference	reference		reference
	1	3.442	3.00-4.00		<0.05
	MPMNs information
	only 1	reference	reference		reference
	1st	2.7196	2.41-3.06		<0.05
	2nd	2.5708	2.34-2.83		<0.05
	3rd or more	3.4313	2.97-3.96		<0.05
	sex
	female	reference	reference		reference
	male	1.5547	1.43-1.69		<0.05
PDTC	age(years)
	0-39	reference	reference		reference
	40-49	0.34	0.01-9.27		0.52
	50-59	0.16	0-9.51		0.38
	60-69	0.39	0.02-6.20		0.5
	70-79	0.34	0.03-3.44		0.36
	80-84	1.93	0.14-27.65		0.63
	85+	0.17	0-3.29		0.24
	race
	Black	reference	reference		reference
	white	1.81	0.18-18.11		0.61
	Asian	0.5	0-31.69		0.75
	American Indian
	T
	1	reference	reference		reference
	2	47.7	1.64-1386.2		<0.05
	3	39.6	3.36-466.8		<0.05
	4	585.9	13.67-25101.38		<0.05
	N
	0	reference	reference		reference
	1	0.41	0.06-2.66		0.35
	M
	0	reference	reference		reference
	1	5.52	0.70-43.7		0.11
	MPMNs information
	only 1	reference	reference		reference
	1st	84.91	0.75-9565.75		0.07
	2nd	78.12	4.08-1492.84		<0.05
	3rd or more	1.45	0.10-20.18		0.78
	sex
	female	reference	reference		reference
	male	0.26	0.06-1.13		0.07
