# Supplementary material for: Construction and Validation of a nanogram to predict the impact of multiple primary tumors on survival of different subtypes of thyroid carcinoma
Source: Research Square preprint supplement (doi:10.21203/rs.3.rs-4061062/v1), 2024-04-01
Supplement: Supplementary file 2 [file f2bcbb3556b992c0cea1e598.xlsx]

## Sheet: Sheet1
Table 1:The training set numbers, validation set case numbers, and proportions for each pathological type of thyroid cancer in this study.
subject		N=48,700		training set n(%)		validation set n(%)
histology
ATC n（%）		528(100)		372(70.5)		156(29.5)
	age(years)
	0-39	7(1.3) 21(3.9) 78(14.8) 158(29.9) 135(25.6) 60(11.4) 69(13.1)		5(1.3)		2（1.3）
	40-49			14(3.8)		7（4.5）
	50-59			53(14.2)		25（16.0）
	60-69			114(30.6)		44（28.2）
	70-79			100(26.9)		35（22.4）
	80-84			39（10.5）		21（13.5）
	85+			47（12.6）		22（14.1）
	race
	Black	43(8.1)		34（9.1）		9（5.8）
	white	416(78.8)		292（78.5）		124（79.5）
	Asian	66(1.3)		44（11.8）		22（14.1）
	American Indian	3(0.6)		2（0.5）		1（0.6）
	T
	0	0		0		0
	1	0		0		0
	2	0		0		0
	3	0		0		0
	4	528(100)		372（100）		156（100）
	N
	0	203(38.4)		139（37.4）		64（41.0）
	1	325(61.6)		233（62.6）		92（59.0）
	M
	0	282(53.4)		195（52.4）		87（55.8）
	1	246(46.6)		177（47.6）		69（44.2）
	MPMNs information
	only 1	395(74.8)		274（73.7）		121（77.6）
	1st	14(2.7)		11（（3.0））		3（1.9）
	2nd	98(18.6)		75（20.2）		23（14.7）
	3rd or more	21(4.0)		12（3.2）		9（5.8）
	sex
	female	516(97.7)		362（97.3）		154（98.7）
	male	12(2.3)		10（2.7）		2（1.3）
FTC n(%)		3262(100)		2286(100)		976(100)
	age(years)
	0-39	873(26.8)		602(26.3)		271(27.8)
	40-49	584(17.9)		418(18.3)		193(19.8)
	50-59	665(20.4)		472(20.6)		166(17.0)
	60-69	606(18.6)		426(18.6)		180(18.4)
	70-79	401(12.3)		276(12.1)		125(12.8)
	80-84	83(2.5)		58(2.5)		25(2.6)
	85+	50(1.5)		34(1.5)		16(1.6)
	race
	Black	416(12.7)		296(12.9)		120(12.3)
	white	2539(77.8)		1784(78.0)		755(77.4)
	Asian	286(8.8)		191(8.4)		95(9.7)
	American Indian	21(6.4)		15(0.7)		6(0.6)
	T
	0	10(0.3)		6(0.3)		4(0.4)
	1	764(23.4)		535(23.4)		229(23.5)
	2	2598(79.6)		906(39.6)		392(40.2)
	3	1101(33.8)		787(34.4)		314(32.2)
	4	89(2.7)		52(2.3)		37(4.0)
	N
	0	3151(96.6)		2209(96.6)		942(96.5)
	1	111(3.4)		77(3.4)		34(3.5)
	M
	0	3119(95.6)		2186(95.6)		933(95.6)
	1	143(4.4)		100(4.4)		43(4.4)
	MPMNs information
	only 1	2646(81.1)		1844(80.7)		802(82.2)
	1st	211(6.5)		154(6.7)		57(5.8)
	2nd	355(10.9)		249(10.9)		106(10.9)
	3rd or more	50(1.5)		39(1.7)		11(1.1)
	sex
	female	2292(70.3)		1616(70.7)		676(69.3)
	male	970(29.7)		670(29.3)		300(30.7)
MTC n(%)		1252（100）		876（70）		376（30）
	age(years)
	0-39	230（18.4）		153（17.5）		77(20.5)
	40-49	202（16.1）		141（16.1）		61(16.0)
	50-59	278（22.2）		204（23.3）		80(21.3)
	60-69	296（23.6）		208（23.6）		88(23.5)
	70-79	181（14.5）		126（14.5）		55(14.5)
	80-84	45（3.6）		32（3.6）		13(3.6)
	85+	20（1.6）		12（1.4）		8(2.1)
	race
	Black	97（7.7）		89（10.1）		0
	white	1061（84.7）		593（67.7）		10(83.3)
	Asian	87（6.9）		60（6.9）		2(16.7)
	American Indian	7（0.6）		134（15.3）
	T
	1	593（47.3）		415(47.3)		6(50.0)
	2	296（23.6）		207(23.7)		2(16.7)
	3	266（21.2）		187(21.2)		3(25.0)
	4	97（7.7）		67(7.7)		1(8.3)
	N
	0	765（61.1）		534(61.1)		5(41.7)
	1	497（39.7）		342(39.9)		7(58.3)
	M
	0	1157（92.4）		814(83.4)		10(83.3)
	1	95（7.6）		62(7.08)		2(16.7)
	MPMNs information
	only 1	906（72.4）		631(72.0)		9(75.0)
	1st	122（9.7）		85(9.7)		3(25.0)
	2nd	181（14.5）		127(14.4)		0
	3rd or more	43（3.4）		30(3.4)		0
	sex
	female	737（58.9）		516(58.9)		4(33.3)
	male	515（41.1）		360(41.1)		8(66.7)
PTC n(%)		43604(100)		30524（100）		13080（100）
	age(years)
	0-39	12636(29.0)		8845（29.0）		3791（29.0）
	40-49	9529(21.9)		6703（22.0）		2826（21.6）
	50-59	10115(23.2)		7109（23.3）		3006（23.0）
	60-69	7093(16.2)		4879（16.0）		2214（16.9）
	70-79	3209（7.4）		2252（7.4）		957（7.3）
	80-84	660（1.5）		474（1.6）		186（1.4）
	85+	362（0.8）		262（0.7）		100（0.8）
	race
	Black	2401（5.5）		1709（5.6）		693（5.3）
	white	35700（81.9）		24979（81.8）		10721（82.0）
	Asian	5196（11.9）		3621（11.9）		1575（12.0）
	American Indian	307（0.7）		216（0.7）		91（0.7）
	T
	0	78（0.2）		56（0.2）		22（0.2）
	1	27484（63.0）		19238（63.0）		8246（63.0）
	2	5683（13.0）		4017（13.2）		1666（12.7）
	3	8784（20.1）		6132（20.1）		2652（20.3）
	4	1575（3.6）		1081（3.5）		494（3.8）
	N
	0	30904（70.9）		21613（70.8）		9291（71.0）
	1	12700（29.1）		8911（29.2）		3789（29.0）
	M
	0	43129（98.9）		30184（98.9）		12945（99.0）
	1	475（1.1）		340（1.1）		135（1.0）
	MPMNs information
	only 1	35475（81.4）		24820（81.3）		10655（81.4）
	1st	2774（6.4）		1723（5.6）		724（5.5）
	2nd	4761（10.9）		3335（10.9）		1426（10.9）
	3rd or more	921（2.1）		646（2.1）		275（2.1）
	sex
	female	33310（76.4）		23329（76.4）		9981（76.3）
	male	10294（23.6）		7195（23.6）		3099（23.7）
PDTC		47(100)		35		12
	age(years)
	0-39	6(12.8)		5(14.3)		1(8.3)
	40-49	4(8.5)		3(8.6)		1(8.3)
	50-59	8(17.0)		5(14.3)		3(25.0)
	60-69	6(12.8)		6(17.1)		0
	70-79	11(23.4)		8(22.9)		3(25.0)
	80-84	6(12.8)		3(8.6)		3(25.0)
	85+	8(17.0)		5(14.3)		1(8.3)
	race
	Black	1(2.1)		1(2.9)		0
	white	42(89.4)		32(91.4)		10(83.3)
	Asian	4(8.5)		2(8.3)		2(16.7)
	American Indian	0
	T
	0	0		0		0
	1	19(40.4)		13(37.1)		6(50.0)
	2	10(21.3)		8(22.9)		2(16.7)
	3	11(23.4)		8(22.9)		3(25.0)
	4	7(14.9)		6(17.1)		1(8.3)
	N
	0	22(46.8)		17(48.6)		5(41.7)
	1	25(53.2)		18(38.3)		7(58.3)
	M
	0	41(87.2)		31(88.6)		10(83.3)
	1	6(12.8)		4(11.4)		2(16.7)
	MPMNs information
	only 1	35(74.5)		26(74.3)		9(75.0)
	1st	5(10.6)		2(5.7)		3(25.0)
	2nd	6(12.8)		6(17.1)		0
	3rd or more	1(2.1)		1(2.9)		0
	sex
	female	16(34.0)		12(34.3)		4(33.3)
	male	31(66.0)		23(65.7)		8(66.7)
